1 **The relationship between blastocyst morphology and the sex ratio of singleton**  
2 **births in single blastocyst transfer cycles: A retrospective cohort study**

3 **Running title:** Relationship between blastocyst morphology and the sex ratio of  
4 singleton births

5

6 Jijun Hu, Yichun Guan\*, Rujing Yang, Lijun Sun, Hua Lou, Xingling Wang

7 The Third Affiliated Hospital of Zhengzhou University, Reproductive Medicine  
8 Center, Zhengzhou, China

9

10 **\*Corresponding Author:**

11 Yichun Guan

12 The Third Affiliated Hospital of Zhengzhou University, Reproductive Medicine  
13 Center, Zhengzhou, China

14 Tel: +86-13673459605

15 E-mail: lisamayguan@163.com

16

17 **Abstract**

18 **Background:** To study the relationship between blastocyst morphology and the sex  
19 ratio of singleton births in single blastocyst transfer cycles.

20 **Methods:** This retrospective cohort study included women who underwent *in vitro*  
21 fertilization/intracytoplasmic sperm injection-embryo transfer (IVF/ICSI-ET) from  
22 January 2017 to December 2019 and obtained a single live baby following a single  
23 blastocyst transfer. The sex ratio which influenced by many possible factors were  
24 studied. Age-stratified analysis was performed for the maternal and paternal groups  
25 younger and older than 35 years. The 3108 cycles included here were grouped by sex

**NOTE:** This preprint reports new research that has not been certified by peer review and should not be used to guide clinical practice.

26 at birth (male: 1777 cycles and female: 1331 cycles). Blastocysts were conceived via  
27 2834 IVF and 274 ICSI treatments, and were used for 1054 fresh ET cycles and 2054  
28 frozen-thawed embryo transfer (FET) cycles.

29 **Results:** Sex ratio among singleton of poor blastocyst decreased significantly  
30 compared to those of good blastocyst (51.5% vs 60%,  $P<0.001$ ). The results of  
31 multivariate logistic analysis showed that high-quality blastocysts had a 151% higher  
32 probability of being male singleton than poor-quality blastocysts ( $P<0.001$ ). Further  
33 stratified analysis shows that in both group younger than 35 the sex ratio increased  
34 significantly in grades A and/or B trophoctoderm ( $P<0.001$ ) and good-quality  
35 blastocysts ( $P<0.001$ ). While grade A inner cell mass (ICM) degree was significantly  
36 associated with a lower sex ratio than grade B ( $P<0.05$ ).

37 **Conclusions:** A single high-quality blastocyst transfer was significantly associated  
38 with a higher neonatal sex ratio. Grade A trophoctoderm and grade B ICM contributed  
39 to improving the implantation potential of male blastocysts, especially in infertile men  
40 or women  $\leq 35$  years old.

41

42 **Key Words:** sex ratio; single blastocyst transfer; single live birth; blastocyst quality;  
43 inner cell mass; trophoctoderm

44

## 45 **Background**

46 IVF was first developed over 40 years ago. Millions of babies have since been  
47 born as a result of infertility treatment worldwide. Routine blastocyst culture and  
48 transfer using sequential culture media in IVF/ICSI is associated with a significant  
49 increase in implantation rates and clinical pregnancy rate. However, there are some  
50 adverse effects in blastocyst transfer such as a male-biased imbalance in the sex ratio

51 of newborns and an increased incidence of monozygotic twinning (MZT). [1-3]

52 A three-part scoring system, which based on blastocyst expansion, inner cell  
53 mass, and trophectoderm development formulated by Gardner and Schoolcraft  
54 [4], aiming to grade human blastocysts before transfer. The scoring system brought  
55 great convenience to embryologists and researchers' studies on the development and  
56 viability of blastocyst. In many cases, blastocysts achieving the best morphologic  
57 scores often achieve implantation and produce a live birth, and those with high scores  
58 on trophectoderm have relatively easy access to a male child (2021).

59 The human sex ratio is often expressed as the number of males per 100 female  
60 live births [5]. In Western gender-neutral countries, the sex ratio at birth is estimated  
61 to be approximately 1.06 [6]. In Japan, the overall neonatal sex ratio has steadily  
62 declined from 1.079 in 1970 to as low as 1.056 in 2016 (Ministry of Health, Labour  
63 and Welfare Vital Statistics of Japan 2016). In the 2000 census in China, the reported  
64 sex ratio at birth was 117 per 100 female births, which appears to be due to a  
65 declining fertility rate and a traditional preference for males, a phenomenon that is  
66 common to many other Asian countries [7]. A recent study by Fan et al. reported that  
67 the sex ratio at birth gradually declined to normal levels (1.047 with the universal  
68 child policy) following the gradual rollout of the two-child policy in China [8].

69 The sex ratio at birth from assisted artificial technology cycles ranges from  
70 1.03–1.25. However, there are discrepancies in the sex ratio between embryos  
71 generated by standard IVF/ICSI, and between cleavage and single blastocyst transfer  
72 (SBT) embryos. As SBT is the most effective approach for avoiding multiple  
73 pregnancies, SBT has gradually become the preferred embryo transfer strategy  
74 throughout the world [9-14]. However, a male-biased imbalance in the sex ratio is one  
75 of the important potential limitations in blastocyst transfer [1, 3]. Several studies have

76 reported a significantly higher sex ratio at birth among infants born after SBT (54.1%)  
77 than among those born after cleavage-stage (day 3) transfer cycles (49.9%) [15, 16].

78 In practice, embryologists tend to select preferentially better morphology and  
79 more developmentally advanced blastocysts for transfer, because good-quality  
80 blastocyst has higher implantation rate and clinical pregnancy rate. The contribution  
81 of these parameters to the implantation potential or sex ratio is not fully known. Some  
82 studies have reported that trophectoderm morphology may be predictive of pregnancy  
83 outcomes and sex ratio related to SBT [17, 18].

84 We intended to study the relationship between blastocyst morphology and the  
85 sex ratio of singleton births in single blastocyst transfer. To that end, here we  
86 analyzed clinical data for the SR of IVF/ICSI children conceived after SBT between  
87 2017 and 2019. The variables considered in this research included: assisted  
88 reproductive technologies (ART) such as IVF, ICSI, FET, or ET, maternal or paternal  
89 age, and year of infertility.

90

## 91 **Methods**

### 92 **Study subjects**

93 This retrospective cohort study included the singleton offspring born to mothers  
94 after successful treatment cycles following the autologous SBT of  
95 non-preimplantation genetic testing (PGT) blastocysts at the Reproductive Medicine  
96 Center of the Third Affiliated Hospital of Zhengzhou University between January  
97 2017 and December 2019. The study was carried out after the protocol was approved  
98 by the Institutional Review Board of The Third Affiliated Hospital of Zhengzhou  
99 University. Informed consent was waived due to retrospective design of the study  
100 based on our local ethics committee protocols.

## 101 **Ovarian stimulation protocol**

102 Each female patient underwent a conventional ovarian hyperstimulation procedure  
103 [19, 20] involving a gonadotrophin releasing hormone agonist or antagonist or mild  
104 stimulation protocol. The physician adjusted the starting dose according to the  
105 patient's age, body mass index (BMI) and ovarian reserve. Ovarian follicle  
106 development was monitored based on serum estradiol and transvaginal  
107 ultrasonographic measurements. Oocytes were retrieved transvaginally 36–38h after  
108 human chorionic gonadotrophin (Serono, Aubonne, Switzerland) administration when  
109 at least 40% of the follicles had reached or exceeded an average diameter of 18mm as  
110 determined by ultrasound. The follicles were aspirated using a single-lumen needle  
111 attached to a syringe under transvaginal ultrasound guidance. The oocytes were then  
112 inseminated via conventional IVF/ICSI.

## 113 **Laboratory protocol**

114 Embryos were placed in an incubator (K-MINC-1000, Cook, USA) and cultured  
115 at 37°C under 6% CO<sub>2</sub> and 5% O<sub>2</sub>. Embryos were cultured in G-1™ plus (Vitrolife,  
116 Sweden) from the pronucleate stage to day 3. On day 3 of culture, the embryo cell  
117 number and morphology were scored. Day 3 embryos are scored from I to IV. Classes  
118 I–III represent embryos that are available for transfer. After scoring, the embryos  
119 were subsequently transferred to G-2™ plus (Vitrolife, Sweden) medium for an  
120 additional 2–3 days of culture (days 5–6 of development) [21]. On day 5, the  
121 percentage of blastocyst formation was determined, and one blastocyst was selected  
122 for fresh cycle transfer, and the untransferred blastocysts were cryopreserved. On day  
123 5 or 6 after insemination, blastocyst morphology was evaluated according to that  
124 described by Gardner and Schoolcraft [22]. Blastocysts expansion degree > 3, inner  
125 cell mass (ICM) grade A/B, and trophectoderm grade A/B (AA, AB, BA, BB) were

126 considered high-quality blastocysts. Blastocysts expansion degree  $> 3$ , ICM grade  
127 A/B and trophectoderm grade C (AC, BC) were considered low-quality blastocysts  
128 [23]. All gamete and embryo manipulations occurred in a clean bench designed to  
129 control humidity, temperature, and pH fluctuation.

130 A laser hole caused the blastocysts to collapse, and the shrunken blastocyst was  
131 vitrified using a Cryotop device (Kitazato BioPharmao. Shizuoka, Japan).  
132 Vitrification and warming kits were used as media. For vitrification, the blastocysts  
133 were first equilibrated in solution I (7.5% v/v ethylene glycol [EG] and 7.5% v/v  
134 dimethyl sulfoxide [DMSO]) at room temperature for 10 min and then placed into  
135 vitrification solution II (15% v/v EG, 15% v/v DMSO, and 0.5 M sucrose) for 1 min.  
136 Subsequently, blastocysts were individually loaded onto Cryotop in a volume of  
137  $< 0.1 \mu\text{L}$  and quickly plunged into liquid nitrogen. The blastocyst was warmed by  
138 placing the Cryotop in thawing solution (1.0 M sucrose) for 1 min at  $37^\circ\text{C}$ . The  
139 blastocyst was then transferred to dilution solution (0.5 M sucrose) for 3 min at room  
140 temperature, then washed twice in washing solution at room temperature for 3 min  
141 each. The blastocyte was transferred into a  $20\text{-}\mu\text{L}$  droplet of culture medium (G-2;  
142 Vitrolife) under mineral oil. Blastocysts were transferred 1–2 h post-warming.

143

#### 144 **Embryo transfer**

145 Fresh single blastocyst transfer was performed 5 days after fertilization in our  
146 Reproductive Center. ET was routinely performed under abdominal ultrasound  
147 guidance. Fresh ET was cancelled in cases with severe ovarian hyperstimulation  
148 syndrome (OHSS), an endometrial thickness of  $\leq 7$  mm, progesterone levels  $\geq 2 \mu\text{g/L}$   
149 on the human chorionic gonadotropin (HCG) trigger day, and some other special  
150 conditions; all the embryos were cryopreserved and FETs were subsequently

151 performed to decrease the rate of OHSS and to improve the clinical pregnancy rate.

152 FET and clinical pregnancy confirmed were performed referring to the  
153 descriptions of the previous study[17].The singleton SR was primary outcome  
154 measure of this study. The sex ratio at birth was calculated as the number of males per  
155 100 female live births.

## 156 **Statistical analysis**

157 All data analyses were performed using Statistical Package for Social Sciences  
158 (SPSS) software package version 22.0 (IBM Corp, Armonk, NY, USA). For  
159 continuous variables, normally distributed variables are expressed as the mean and  
160 standard deviation, while non-normally distributed variables are shown as the median  
161 and interquartile range. Categorical variables are summarized as frequencies with  
162 proportions. The unpaired Student's *t* test or Mann–Whitney *U* test was used for  
163 comparing the difference between the two groups. Univariate regression analysis was  
164 performed for factors, including maternal age, paternal age, mean duration of  
165 infertility, mean maternal BMI, type of infertility, type of infertility (%), day of  
166 blastocyst transfer, type of fertilization, quality of transferred blastocyst, ICM, and  
167 trophoctoderm grade. Both crude and adjusted multivariable logistic regression  
168 models for sex ratio of live singleton were established (enter). For the adjusted  
169 multivariate logistic regression model, factors including maternal age, paternal age,  
170 BMI, duration of infertility, type of infertility, and day of blastocyst transfer were  
171 further adjusted. *P* value <0.05 was set as the threshold of statistical significance.

172

## 173 **Results**

### 174 **Study participants and baseline characteristics**

175 A total of 5632 SBT cycles of women who underwent IVF/ICSI-ET were

176 screened. Of these, 177 cycles that underwent PGT were excluded. Of the 5285  
177 autologous cycles remaining, there were 328 miscarriages, 29 ectopic pregnancies,  
178 and 56 cycles that resulted in monozygotic twins. After excluding these cycles, there  
179 were 3108 cycles that resulted in singleton live births, which were included in the  
180 analysis. There were 1054 (33.9%) fresh blastocyst transfer cycles and 2054 (66.1%)  
181 frozen blastocyst transfer cycles, 2070 (66.6%) high-quality and 1038 (33.4%)  
182 poor-quality single blastocyst FETs. The blastocysts were conceived via 2834  
183 (91.2%) IVF and 274 (8.8%) ICSI treatments. The analyzed cycles yielded 1777 male  
184 infants and 1331 female infants, and the sex ratio was 133% (133/100). All the SBT  
185 cycles of each patient was analyzed to avoid repeated measures bias. Patients who  
186 underwent PGT or used donor oocytes or donor sperm were excluded from this study.  
187 Figure 1 presents the identification and collation process of the study sample. Table 1  
188 describes the baseline characteristics of the included treatment cycles.

189 The results of the univariable analysis for the potential factors influencing sex  
190 ratio among singleton live births revealed that transfer of a single high-quality  
191 blastocyst resulted in a significantly higher sex ratio than SBT of a poor-quality  
192 blastocyst (60% vs. 51.5%,  $P < 0.001$ , Fig. 2). Transfer of blastocysts with a higher  
193 TE grade and lower ICM grade resulted in a significantly higher sex ratio. Maternal  
194 age, paternal age, duration of infertility, maternal BMI, main infertility cause, type of  
195 fertilization, or day of embryo transfer had no significant influence on the sex ratio  
196 (Table 2).

### 197 **Multivariate analysis**

198 Multivariate analysis was performed after adjusting for potential confounding  
199 factors. Based on the results of the analysis, we identified significant associations of  
200 sex ratio among singleton births with the morphological characteristics of blastocysts.



201 The results of the multivariate analysis revealed that high-quality blastocysts have a  
202 190% higher probability of being male than poor-quality blastocysts (aOR, 1.964;  
203 95% CI, 1.559–2.474;  $P < 0.001$ ). However, blastocysts with grade A ICM had a 37%  
204 lower probability of being male than in blastocysts with grade B trophoctoderm (aOR  
205 0.632; 95% CI, 0.529–0.757;  $P < 0.001$ ). Moreover, when the trophoctoderm was of  
206 grade A, there was a 190% higher probability of being male than when the  
207 trophoctoderm was of grade C (aOR, 1.964; 95% CI, 1.559–2.474;  $P < 0.001$ ; Table  
208 3).

### 209 **Stratified analysis by maternal and paternal age**

210 We also determined relationship between quality classification of ICM grade, TE  
211 grade of transferred blastocysts and sex ratio according to parents aged 35 and older.  
212 When the maternal age was  $\leq 35$ , blastocysts with grade A ICM had a significantly  
213 lower likelihood of being male than with grade B ICM (OR, 0.803; 95% CI, 0.677–  
214 0.951;  $P = 0.011$ ). Similarly, when the paternal age was  $\leq 35$  years, blastocysts with  
215 grade A ICM had a significantly lower likelihood of being male than blastocysts with  
216 grade B ICM (OR, 0.791; 95% CI, 0.663–0.942;  $P = 0.009$ ). Blastocysts with grades  
217 A and B TE in women  $\leq 35$  years and grade B TE in men  $\leq 35$  years had a significantly  
218 higher sex ratio than those with grade C TE (women  $\leq 35$  years grade B TE: OR,  
219 1.401; 95% CI, 1.172–1.676 and grade A TE: OR, 1.589; 95% CI, 1.282–1.970;  $P$   
220  $< 0.001$  for both) (men  $\leq 35$  years grade B TE: OR, 1.555; 95% CI, 1.245–1.942;  $P$   
221  $< 0.001$ ). Furthermore, good-quality blastocysts were significantly more likely to be  
222 male in both women and men aged  $\leq 35$  years (OR: 1.461, 95% CI, 1.238–1.725;  $P$   
223  $< 0.001$  for women and OR: 1.442; 95% CI, 1.214–1.712; and  $P < 0.001$  for men)  
224 (Table 4)

225

## 226 **Discussion**

227 In the present study, SBT was used to avoid the complications associated with  
228 multiple pregnancies and maintain higher rates of implantation, pregnancy, and live  
229 birth in couples undergoing ART. Our results following the analysis of 3108 cycles  
230 revealed that high-quality blastocysts had a significantly higher probability of being  
231 male than poor-quality blastocysts. However, blastocyst culture conditions  
232 contributed to preferential selection of male blastocysts for transfer because of the  
233 advanced developmental rates *in vitro*. It is worthwhile to note that some studies  
234 explored the relationship between the stage at which ET occurs and the SSR, and  
235 found that ET at the blastocyst stage tends to increase the SSR compared with ET at  
236 the cleavage stage, and this effect is independent of other factors [24].

237 Among the 3108 IVF/ICSI cycles over a three-year period, there were 1777  
238 males and 1331 females, making the SR 133 males per 100 females, which was  
239 consistent with the ratios reported in previous studies. A large nationwide cohort  
240 study in Japan showed a higher sex ratio after blastocyst transfer relative to  
241 spontaneous conception (OR: 1.095; 95% CI: 1.001–1.198) [3]. The study also found  
242 that implantation with high-quality blastocysts was associated with an increased sex  
243 ratio during SBT cycles. The similar result that blastocyst transfer was associated with  
244 increased sex ratio was also found in a retrospective cohort study [25].

245 We also explored the effect of FET on SSR. Very few studies have reported  
246 differences in the SSR following fresh and frozen ET, and the results are controversial  
247 [26, 27]. However, the results of our preliminary univariable analysis after controlling  
248 for related factors, including maternal age, paternal age, mean duration of infertility,  
249 mean maternal BMI, type of infertility, type of infertility (%), day of blastocyst  
250 transfer, type of fertilization, quality of transferred blastocyst, ICM, and

251 trophoctoderm grade, showed that the SSR was not related with FET (OR = 0.871,  
252 95% CI: 0.750–1.013,  $P = 0.074$ ). In most reproductive medical centers in China,  
253 blastocyst transfers are usually performed in FET cycles, and our center was no  
254 exception. It may be that blastocyst transfer and not FET is responsible for the  
255 skewing of the SSR toward males.

256 Previous studies have explored the effect of the IVF/ICSI insemination method  
257 on sex ratio. [28] ICSI, which is primarily used to treat male factor infertility, is now  
258 widely used all over the world. Data from other countries have shown that ICSI use  
259 significantly reduces the proportion of male babies compared with IVF (48.8% versus  
260 51.4% in America; 50.0% vs 53.0% in Australia and New Zealand) [15, 29].  
261 Although the sex ratio with ICSI insemination was found to be lower than that with  
262 IVF insemination in our study, this difference was not statistically significant. One  
263 study showed that ICSI reduces SSR only in cleavage-stage embryo transfer cycles,  
264 but not in blastocyst transfer cycles [24]. Currently, it is unclear why ICSI  
265 insemination reduces SSR. Tarín et al. compared sex ratios at implantation and birth  
266 in cleavage- and blastocyst-stage transfer cycles to propose molecular mechanisms  
267 accounting for differences in post-implantation mortality in male and female offspring  
268 and consequent variations in the sex ratios at birth in ART cycles. They reported that  
269 in vitro culture-induced precocious X-chromosome inactivation together with  
270 ICSI-induced decrease in the number of trophoctoderm cells in female blastocysts  
271 may account for the preferential female mortality at early post-implantation stages,  
272 resulting in the observed variations in sex ratios at birth in ART cycles [30].

273 The similar effect was observed in previous study that diverse blastocyst  
274 parameter grades were related to the sex ratio of singleton live births in SBT cycles  
275 [17]. The proportion of male childbirth from high-quality blastocysts transfer was

276 significantly increased than those from poor-quality blastocysts transfer, which had  
277 the trend of elevation with the advance of blastocysts quality. In the present study, we  
278 also found that blastocysts with better morphological scores were much more likely to  
279 produce male infants, and the trophoctoderm grade and ICM grade were both  
280 identified as important factors affecting the newborn sex ratio after a single-blastocyst  
281 transfer cycle.

282 The trophoctoderm grade A blastocysts had statistically significant association  
283 with the sex ratio among newborns conceived via blastocyst transfer, which was  
284 supported by M.B. Borgström's investigation [31]. That is to say, blastocyst  
285 morphology was closely related to the sex ratio of livebirth when blastocysts with  
286 higher grade trophoctoderm were transferred. The contribution of trophoctoderm  
287 during the implantation stage could be attributed to its impact as a promoter of  
288 incubation and endometrial invasion [32]. The study of Ebner found that the  
289 morphology of trophoctoderm was associated with the sex ratio of offspring, with the  
290 rates of implantation, pregnancy, and miscarriage. What matters most was that male  
291 blastocysts were 2.53 times more likely than female ones with grade A TE [33].  
292 Previous study have shown that human female embryos consume much higher levels  
293 of glucose than male embryos [34], which might reflect the need for more energy in  
294 humans to inactivate the second X-chromosome [35] thereby reducing the mitotic  
295 progression. Interestingly, we demonstrated that after controlling for the trophoblast  
296 grade, ICM grade B was positively correlated with the higher sex ratio among  
297 singleton births but not ICM grade A. Thus, disparities in the morphological scores  
298 between male and female embryos were likely to reflect some difference in  
299 development. Previous studies had different conclusions about the relationship  
300 between ICM grade and sex ratio. Lou et al. found that the ICM quality had no

301 obvious effect on the newborn sex ratio after single-blastocyst FET cycles [17]. Kate  
302 et al. demonstrated that newly expanded normally fertilized blastocysts had an  
303 average of  $58.3 \pm 8.1$  cells on day 5, which increased to  $84.4 \pm 5.7$  and  $125.5 \pm 19$  on  
304 days 6 and 7, respectively. The number of TE cells was basically the same on days 5  
305 and 6 ( $37.9 \pm 6.0$  and  $40.3 \pm 5.0$ , respectively), and doubled on day 7 ( $80.6 \pm 15.2$ ). In  
306 contrast, the number of ICM cells doubled between days 5 and 6 ( $20.4 \pm 4.0$  and  $41.9$   
307  $\pm 5.0$ , respectively) and remained almost unchanged on day 7 ( $45.6 \pm 10.2$ ) [36]. This  
308 was in line with our results, i.e., male embryos grew more rapidly than female ones,  
309 contributing to the higher proportion of male blastocysts seen on day 5. However,  
310 there were fewer ICM cells than TE cells on day 5, leading to a lower ICM grade.  
311 Inversely, the proportion of male embryos declined on day 6 compared to that on day  
312 5; however, the ICM cells increased, which may account for a higher ICM grade. In  
313 China, there were studies concerning the ICM grade in relation to the newborn sex  
314 ratio, clinical pregnancy rate, live birth rate, and pregnancy loss rate. However, not all  
315 results were consistent. In our reproductive center, embryo transfer strategy required  
316 that the two best-quality cleavage-stage embryos be chosen for fresh cycle transfer or  
317 for cryopreservation on day 3, with the remaining embryos being cultured to the  
318 blastocyst stage for possible cryopreservation.

319 Therefore, we had very few good embryos (grade AA) and a large percentage of  
320 “fair” BB and “poor” BC embryos, and the strategy required an ICM grade of grade B  
321 or higher for optimal cryosurvival. As we all know, ICM developed into a fetus and  
322 TE develops into the placenta eventually, We does not transfer the blastocyst with  
323 grade C ICM but TE with grade C can be transferred routinely when the ICM is grade  
324 A or B in our center. When an ICM grade was C, the embryos were abandoned.  
325 Therefore, we only evaluated the outcomes associated with embryos having an ICM

326 grade of A or B. In this situation, data concerning the ICM had the risk of information  
327 bias, which is one of the limitations of the study. However, blastocyst transfer is more  
328 advantageous than cleavage-stage embryo transfer in terms of successful implantation  
329 rate and pregnancy rates. We prefer high-quality blastocyst transfer to obtain a better  
330 clinical pregnancy rate. Although we determined that the transfer of high-quality  
331 blastocysts may skew the sex ratio in favor of male embryos, it is difficult to change  
332 perceptions regarding popular blastocyst transfer strategies.

333 In clinical practice, age was a very important factor in considering infertility,  
334 which was strongly associated with gametes, embryo, and clinical outcomes. This  
335 study was stratified by age of infertile patients, and the results revealed that the sex  
336 ratio was significantly affected by blastocyst quality in young patients ( $\leq 35$  years),  
337 which is in agreement with the results of previous studies [1, 3]. Dean et al. referred  
338 to female age as being one of the significant factors affecting the probability of having  
339 a male birth. They found that a lower age was associated with a higher likelihood of  
340 male birth [15]. Bahadur et al. studied a population in the United Kingdom and drew a  
341 similar conclusion [37]. This may be because of the higher oxidative stress level in  
342 advanced maternal age, but male infants had poor survivability when subjected to  
343 high oxidative stress injury compared to female infants. Therefore, male infants may  
344 be miscarried in early pregnancy among women of older age. Furthermore, our results  
345 found that a higher sex ratio was associated with a lower age in men. However, only  
346 few studies have reported the effect of paternal age on sex ratio. Jeremy M found that  
347 the sex ratio significantly decreased with increasing paternal age and remained so  
348 even after adjusting for maternal age in offspring with autism spectrum disorders,  
349 suggesting that the reduction in the sex ratio with increasing paternal age consistent  
350 with de novo genetic or genomic anomalies, which arise more frequently as older men

351 conceive [37].

352 This study has some limitations. As the study was only conducted in a single  
353 center, the results may not be generalizable. In addition, it is uncertain that the data  
354 accurately reflect the real sex ratio at birth finally under the influence of Chinese  
355 culture, which is one limitation of this study. The retrospective nature of this study is  
356 another limitation. In future, prospective multicenter studies should perform stratified  
357 analysis according to maternal or paternal age  $\leq 35$  years in order to validate the  
358 findings of our study.

359

## 360 **Conclusions**

361 In summary, we demonstrated that the morphological criteria associated with  
362 higher-quality blastocysts resulted in a higher sex ratio after SBT. In our study, not  
363 only the trophoctoderm grade but also the ICM grade was significantly associated  
364 with the sex ratio among offspring. The sex ratio increased as the trophoctoderm  
365 grade increased, whereas a higher ICM grade (grade A) resulted in a lower sex ratio  
366 than ICM of grade B, especially in infertile couples in which either partner was below  
367 35 years of age. Our findings may shed light on potential factors underlying the  
368 skewed sex ratio among offspring from blastocyst transfer, which provided reference  
369 for embryo transfer strategy. In future studies, we would further explore the factors  
370 affecting the sex ratio with the aim of maintaining a balanced sex ratio among  
371 offspring in IVF/ICSI, without affecting the pregnancy rate.

372

## 373 **List of abbreviations**

374 in vitro fertilization (IVF)

375 intracytoplasmic sperm injection-embryo transfer (ICSI-ET)

376 frozen-thawed embryo transfer (FET)  
377 primary sex ratio (PSR)  
378 secondary sex ratio (SSR)  
379 single blastocyst transfer (SBT)  
380 inner cell mass (ICM)  
381 trophoctoderm (TE)  
382 assisted reproductive technologies (ART)  
383 preimplantation genetic testing (PGT)  
384 body mass index (BMI)  
385 dimethyl sulfoxide (DMSO)  
386 ovarian hyperstimulation syndrome (OHSS)  
387 human chorionic gonadotropin (HCG)  
388 hormone replacement therapy (HRT)  
389 Statistical Package for Social Sciences (SPSS)

390

391 **Declarations**

392 **Ethics approval and consent to participate**

393 The study was carried out after the protocol was approved by the Institutional Review  
394 Board of The Third Affiliated Hospital of Zhengzhou University. I confirm that all  
395 methods were performed in accordance with the relevant guidelines. The requirement  
396 for informed consent was waived by the Institutional Review Board of The Third  
397 Affiliated Hospital of Zhengzhou University because of the retrospective nature of the  
398 study.

399 **Consent for publication**

400 Not applicable.



## 401 **Availability of data and materials**

402 All data generated or analysed during this study are included in this published article

## 403 **Competing interests**

404 The authors declare that they have no competing interests

## 405 **Funding**

406 Not applicable.

## 407 **Authors' contributions**

408 Study design: JJH, YCG, and RJY. Data acquisition and analysis: JJH and RJY.

409 Drafting of the manuscript and interpretation: YCG, HL. Revision of the manuscript:

410 LJS ,XLW and RJY. The authors read and approved the final manuscript.

## 411 **Acknowledgments**

412 The authors would like to thank all of the participants and the staff of the

413 Reproductive Center, the Third Affiliated Hospital of Zhengzhou University, for their

414 selfless assistance.

415

416

## 417 **References**

- 418 1. Supramaniam PR, Mittal M, Ohuma EO, Lim LN, McVeigh E, Granne I, et al. Secondary sex  
419 ratio in assisted reproduction: an analysis of 1 376 454 treatment cycles performed in the UK. *Human*  
420 *reproduction open*. 2019;2019(4):hoz020. Epub 2019/10/11. doi: 10.1093/hropen/hoz020. PubMed  
421 PMID: 31598568.
- 422 2. Lin PY, Huang FJ, Kung FT, Wang LJ, Chang SY, Lan KC. Comparison of the offspring sex ratio  
423 between cleavage stage embryo transfer and blastocyst transfer. *Taiwanese journal of obstetrics &*  
424 *gynecology*. 2010;49(1):35-9. Epub 2010/05/15. doi: 10.1016/s1028-4559(10)60006-x. PubMed PMID:  
425 20466290.
- 426 3. Hattori H, Kitamura A, Takahashi F, Kobayashi N, Sato A, Miyauchi N, et al. The risk of  
427 secondary sex ratio imbalance and increased monozygotic twinning after blastocyst transfer: data from  
428 the Japan Environment and Children's Study. *Reproductive biology and endocrinology : RB&E*.  
429 2019;17(1):27. Epub 2019/02/24. doi: 10.1186/s12958-019-0471-1. PubMed PMID: 30795788.
- 430 4. Gardner DK, WB S. In vitro culture of human blastocysts. In: Jansen, R. and Mortimer, D., Eds.,  
431 *Towards Reproductive Certainty: Infertility and Genetics Beyond 1999: The Plenary Proceedings of*

- 432 the 11th World Congress on In Vitro Fertilization and Human Reproductive Genetics, Parthenon Press,  
433 Pearl River. 1999:378-88.
- 434 5. Jacobsen R, Møller H, Mouritsen A. Natural variation in the human sex ratio. *Human*  
435 *reproduction* (Oxford, England). 1999;14(12):3120-5. Epub 1999/12/22. doi:  
436 10.1093/humrep/14.12.3120. PubMed PMID: 10601107.
- 437 6. Hesketh T, Xing ZW. Abnormal sex ratios in human populations: causes and consequences.  
438 *Proceedings of the National Academy of Sciences of the United States of America*.  
439 2006;103(36):13271-5. Epub 2006/08/30. doi: 10.1073/pnas.0602203103. PubMed PMID: 16938885.
- 440 7. Wu Z, Viisainen K, Hemminki E. Determinants of high sex ratio among newborns: a cohort study  
441 from rural Anhui province, China. *Reproductive health matters*. 2006;14(27):172-80. Epub 2006/05/23.  
442 doi: 10.1016/s0968-8080(06)27222-7. PubMed PMID: 16713892.
- 443 8. Fan SL, Xiao CN, Zhang YK, Li YL, Wang XL, Wang L. How does the two-child policy affect  
444 the sex ratio at birth in China? A cross-sectional study. *BMC Public Health*. 2020;20(1):789. doi:  
445 10.1186/s12889-020-08799-y. PubMed PMID: 32460822.
- 446 9. De Croo I, Colman R, De Sutter P, Tilleman K. Blastocyst transfer for all? Higher cumulative live  
447 birth chance in a blastocyst-stage transfer policy compared to a cleavage-stage transfer policy. *Facts,*  
448 *views & vision in ObGyn*. 2019;11(2):169-76. Epub 2019/12/12. PubMed PMID: 31824637.
- 449 10. Chen H, Lv JQ, Wu XM, Xiao Y, Xi HT, Zhu CF, et al. Blastocyst-stage versus cleavage-stage  
450 embryo transfer in the first frozen cycles of OHSS-risk patients who deferred from fresh embryo  
451 transfer. *Gynecological endocrinology : the official journal of the International Society of*  
452 *Gynecological Endocrinology*. 2015;31(9):698-701. Epub 2015/07/21. doi:  
453 10.3109/09513590.2015.1062858. PubMed PMID: 26190533.
- 454 11. Zhu L, Xi Q, Zhang H, Li Y, Ai J, Jin L. Blastocyst culture and cryopreservation to optimize  
455 clinical outcomes of warming cycles. *Reproductive biomedicine online*. 2013;27(2):154-60. Epub  
456 2013/06/19. doi: 10.1016/j.rbmo.2013.04.006. PubMed PMID: 23769665.
- 457 12. Hur YS, Ryu EK, Song SH, Yoon SH, Lim KS, Lee WD, et al. A retrospective study of single  
458 frozen-thawed blastocyst transfer. *Clinical and experimental reproductive medicine*. 2016;43(2):106-11.  
459 Epub 2016/07/01. doi: 10.5653/cerm.2016.43.2.106. PubMed PMID: 27358829.
- 460 13. Maheshwari A, Hamilton M, Bhattacharya S. Should we be promoting embryo transfer at  
461 blastocyst stage? *Reproductive biomedicine online*. 2016;32(2):142-6. Epub 2015/12/18. doi:  
462 10.1016/j.rbmo.2015.09.016. PubMed PMID: 26673100.
- 463 14. Monteleone PA, Petersen PG, Peregrino PF, Miorin J, Gomes AP, Fujii MG, et al. Should single  
464 embryo transfer be used in patients with any kind of infertility factor? Preliminary outcomes. *JBRA*  
465 *assisted reproduction*. 2019;23(3):200-4. Epub 2019/03/27. doi: 10.5935/1518-0557.20190006.  
466 PubMed PMID: 30912516.
- 467 15. Dean JH, Chapman MG, Sullivan EA. The effect on human sex ratio at birth by assisted  
468 reproductive technology (ART) procedures--an assessment of babies born following single embryo  
469 transfers, Australia and New Zealand, 2002-2006. *BJOG : an international journal of obstetrics and*  
470 *gynaecology*. 2010;117(13):1628-34. Epub 2010/09/30. doi: 10.1111/j.1471-0528.2010.02731.x.  
471 PubMed PMID: 20875033.
- 472 16. Sharara FI, Abdo G. Incidence of monozygotic twins in blastocyst and cleavage stage assisted  
473 reproductive technology cycles. *Fertility and sterility*. 2010;93(2):642-5. Epub 2009/02/17. doi:  
474 10.1016/j.fertnstert.2008.12.130. PubMed PMID: 19217097.

- 475 17. Lou H, Li N, Zhang X, Sun L, Wang X, Hao D, et al. Does the sex ratio of singleton births after  
476 frozen single blastocyst transfer differ in relation to blastocyst development? *Reproductive biology and*  
477 *endocrinology : RB&E*. 2020;18(1):72. doi: 10.1186/s12958-020-00623-x. PubMed PMID: 32669110.
- 478 18. Chen X, Zhang J, Wu X, Cao S, Zhou L, Wang Y, et al. Trophectoderm morphology predicts  
479 outcomes of pregnancy in vitrified-warmed single-blastocyst transfer cycle in a Chinese population.  
480 *Journal of assisted reproduction and genetics*. 2014;31(11):1475-81. Epub 2014/08/16. doi:  
481 10.1007/s10815-014-0317-x. PubMed PMID: 25123128.
- 482 19. Sun LJ, Zhao B, Hu JJ. Application of three kinds of ovulation induction in in vitro  
483 fertilization/intracytoplasmic sperm injection patients with poor ovarian response. *Chin J Reprod*  
484 *Contracep*. 2018;38(03):186-91.
- 485 20. Wang LI, Sun LJ, Feng YY. A comparative study of ovulation promotion effect between three  
486 kinds of down regulation long protocol in infertile IVF/ICSI patients with normal ovarian function.  
487 *Prog Obstet Gynecol*. 2019;28(08):597-601.
- 488 21. Papanikolaou EG, D'Haeseleer E, Verheyen G, Van de Velde H, Camus M, Van Steirteghem A, et  
489 al. Live birth rate is significantly higher after blastocyst transfer than after cleavage-stage embryo  
490 transfer when at least four embryos are available on day 3 of embryo culture. A randomized  
491 prospective study. *Human reproduction (Oxford, England)*. 2005;20(11):3198-203. Epub 2005/08/02.  
492 doi: 10.1093/humrep/dei217. PubMed PMID: 16055454.
- 493 22. Schoolcraft WB, Gardner DK, Lane M, Schlenker T, Hamilton F, Meldrum DR. Blastocyst  
494 culture and transfer: analysis of results and parameters affecting outcome in two in vitro fertilization  
495 programs. *Fertility and sterility*. 1999;72(4):604-9. Epub 1999/10/16. doi:  
496 10.1016/s0015-0282(99)00311-8. PubMed PMID: 10521095.
- 497 23. Herbemont C, Chekroune S, Bonan S, Cedrin-Durnerin I, Vivot A, Sonigo C, et al. Impact of  
498 post-warming culture duration on clinical outcomes of vitrified good-quality blastocyst transfers: a  
499 prospective randomized study. *Fertility and sterility*. 2018;110(7):1290-7. Epub 2018/12/07. doi:  
500 10.1016/j.fertnstert.2018.07.1153. PubMed PMID: 30503128.
- 501 24. Bu Z, Chen ZJ, Huang G, Zhang H, Wu Q, Ma Y, et al. Live birth sex ratio after in vitro  
502 fertilization and embryo transfer in China--an analysis of 121,247 babies from 18 centers. *PloS one*.  
503 2014;9(11):e113522. Epub 2014/11/21. doi: 10.1371/journal.pone.0113522. PubMed PMID:  
504 25412419.
- 505 25. Fernando D, Halliday JL, Breheny S, Healy DL. Outcomes of singleton births after blastocyst  
506 versus nonblastocyst transfer in assisted reproductive technology. *Fertility and sterility*.  
507 2012;97(3):579-84. Epub 2012/01/28. doi: 10.1016/j.fertnstert.2011.12.032. PubMed PMID:  
508 22281036.
- 509 26. Lin PY, Huang FJ, Kung FT, Wang LJ, Chang SY, Lan KC. Comparison of the offspring sex ratio  
510 between fresh and vitrification-thawed blastocyst transfer. *Fertility and sterility*. 2009;92(5):1764-6.  
511 Epub 2009/06/16. doi: 10.1016/j.fertnstert.2009.05.011. PubMed PMID: 19523616.
- 512 27. Wikland M, Hardarson T, Hillensjö T, Westin C, Westlander G, Wood M, et al. Obstetric  
513 outcomes after transfer of vitrified blastocysts. *Human reproduction (Oxford, England)*.  
514 2010;25(7):1699-707. Epub 2010/05/18. doi: 10.1093/humrep/deq117. PubMed PMID: 20472913.
- 515 28. Wang M, Liu X, Zhang H, Li L, Liu R, Zhang H, et al. Associated factors of secondary sex ratio  
516 of offspring in assisted reproductive technology: a cross-sectional study in Jilin Province, China. *BMC*  
517 *pregnancy and childbirth*. 2020;20(1):666. Epub 2020/11/06. doi: 10.1186/s12884-020-03373-1.  
518 PubMed PMID: 33148206.

- 519 29. Luke B, Brown MB, Grainger DA, Baker VL, Ginsburg E, Stern JE. The sex ratio of singleton  
520 offspring in assisted-conception pregnancies. *Fertility and sterility*. 2009;92(5):1579-85. Epub  
521 2008/10/28. doi: 10.1016/j.fertnstert.2008.08.107. PubMed PMID: 18950756.
- 522 30. Tarín JJ, García-Pérez MA, Hermenegildo C, Cano A. Changes in sex ratio from fertilization to  
523 birth in assisted-reproductive-treatment cycles. *Reproductive biology and endocrinology : RB&E*.  
524 2014;12:56. Epub 2014/06/25. doi: 10.1186/1477-7827-12-56. PubMed PMID: 24957129.
- 525 31. Borgström MB, Kesmodel US, Klausen TW, Danielsen AK, Thomsen T, Gabrielsen A, et al.  
526 Developmental stage and morphology of the competent blastocyst are associated with sex of the child  
527 but not with other obstetric outcomes: a multicenter cohort study. *Human reproduction (Oxford,*  
528 *England)*. 2021;37(1):119-28. Epub 2022/01/06. doi: 10.1093/humrep/deab242. PubMed PMID:  
529 34986219.
- 530 32. Ahlström A, Westin C, Reismer E, Wikland M, Hardarson T. Trophectoderm morphology: an  
531 important parameter for predicting live birth after single blastocyst transfer. *Human reproduction*  
532 *(Oxford, England)*. 2011;26(12):3289-96. Epub 2011/10/06. doi: 10.1093/humrep/der325. PubMed  
533 PMID: 21972253.
- 534 33. Ebner T, Tritscher K, Mayer RB, Oppelt P, Duba HC, Maurer M, et al. Quantitative and  
535 qualitative trophoctoderm grading allows for prediction of live birth and gender. *Journal of assisted*  
536 *reproduction and genetics*. 2016;33(1):49-57. Epub 2015/11/18. doi: 10.1007/s10815-015-0609-9.  
537 PubMed PMID: 26572782.
- 538 34. Gardner DK, Wale PL. Analysis of metabolism to select viable human embryos for transfer.  
539 *Fertility and sterility*. 2013;99(4):1062-72. Epub 2013/01/15. doi: 10.1016/j.fertnstert.2012.12.004.  
540 PubMed PMID: 23312219.
- 541 35. Epstein CJ, Smith S, Travis B, Tucker G. Both X chromosomes function before visible  
542 X-chromosome inactivation in female mouse embryos. *Nature*. 1978;274(5670):500-3. Epub  
543 1978/08/03. doi: 10.1038/274500a0. PubMed PMID: 672979.
- 544 36. Hardy K, Handyside AH, Winston RM. The human blastocyst: cell number, death and allocation  
545 during late preimplantation development in vitro. *Development (Cambridge, England)*.  
546 1989;107(3):597-604. Epub 1989/11/01. PubMed PMID: 2612378.
- 547 37. Anello A, Reichenberg A, Luo X, Schmeidler J, Hollander E, Smith CJ, et al. Brief report:  
548 parental age and the sex ratio in autism. *Journal of autism and developmental disorders*.  
549 2009;39(10):1487-92. Epub 2009/05/20. doi: 10.1007/s10803-009-0755-y. PubMed PMID: 19452267.

550

## 551 **Figure legends**

552 **Figure. 1** Data selection process for the analysis of perinatal outcomes in singleton  
553 live births resulting from single blastocyst transfer (SBT) cycles

554 Note: Flowchart showing exclusions made to singleton cycles for analysis data to  
555 identify component subsets that were merged to construct the final study dataset.

556 PGT=preimplantation genetic testing

557 **Figure. 2** Sex ratio among singleton births following single blastocyst transfer (SBT)  
 558 cycles with different blastocyst qualities.

559 Note: The sex ratio at birth is calculated as the proportion of liveborn males per 100  
 560 females. CI = confidence interval; P value\* was the P value after adjustment  
 561 (P<0.001).

562  
 563 **Table 1.** Characteristics of 3108 cycles, including sex ratio, among singleton births  
 564 from January 2017 to December 2019.

| Live birth sex                            | Female       | Male         | P value |
|-------------------------------------------|--------------|--------------|---------|
| N                                         | 1331         | 1777         |         |
| Maternal age, years (mean ± SD)           | 30.29 ± 4.32 | 30.12 ± 4.25 | 0.288   |
| Paternal age, years (mean ± SD)           | 31.30 ± 5.05 | 31.19 ± 5.02 | 0.578   |
| Mean duration of infertility (years ± SD) | 3.11 ± 2.48  | 3.17 ± 2.50  | 0.511   |
| Mean maternal BMI (kg/m <sup>2</sup> )    | 23.80 ± 3.27 | 23.58 ± 3.21 | 0.061   |
| Type of infertility (%)                   |              |              | 0.605   |
| Primary                                   | 604 (45.38%) | 823 (46.31%) |         |
| Secondary                                 | 727 (54.62%) | 954 (53.69%) |         |
| Factor of infertility (%)                 |              |              | 0.881   |
| Female factor                             | 687 (51.62%) | 929 (52.28%) |         |
| Male factor                               | 324 (24.34%) | 436 (24.54%) |         |
| Mixed factor                              | 240 (18.03%) | 301 (16.94%) |         |
| Unexplained infertility                   | 80 (6.01%)   | 111 (6.25%)  |         |
| Type of blastocyst transfer (%)           |              |              | 0.073   |
| ET                                        | 428 (32.16%) | 626 (35.23%) |         |

|                                    |               |               |                  |
|------------------------------------|---------------|---------------|------------------|
| FET                                | 903 (67.84%)  | 1151 (64.77%) |                  |
| Day of blastocyst transfer (%)     |               |               | 0.655            |
| D5                                 | 1039 (78.06%) | 1399 (78.73%) |                  |
| D6                                 | 292 (21.94%)  | 378 (21.27%)  |                  |
| Type of fertilization (%)          |               |               | 0.832            |
| ICSI                               | 1212 (91.06%) | 1622 (91.28%) |                  |
| IVF                                | 119 (8.94%)   | 155 (8.72%)   |                  |
| Blastocyst quality of transfer (%) |               |               | <b>&lt;0.001</b> |
| Poor                               | 503 (37.79%)  | 535 (30.11%)  |                  |
| Good                               | 828 (62.21%)  | 1242 (69.89%) |                  |
| ICM                                |               |               | <b>0.007</b>     |
| A                                  | 414 (31.10%)  | 474 (26.67%)  |                  |
| B                                  | 917 (68.90%)  | 1303 (73.33%) |                  |
| TE                                 |               |               | <b>&lt;0.001</b> |
| A                                  | 261 (19.61%)  | 418 (23.52%)  |                  |
| B                                  | 567 (42.60%)  | 824 (46.37%)  |                  |
| C                                  | 503 (37.79%)  | 535 (30.11%)  |                  |

565 Note: The sex ratio at birth is calculated as the proportion of males among all  
566 livebirths.

567 CI, confidence interval; BMI, body mass index; D, day; IVF, in vitro fertilization;  
568 ICSI, intracytoplasmic sperm injection; ET, fresh embryo transfer; FET, frozen  
569 embryo transfer

570

571 **Table 2.** Univariable analysis for the potential factors influencing sex ratio among singleton live births

| Clinical features       | Classification          | Univariable analysis |           |             |       |
|-------------------------|-------------------------|----------------------|-----------|-------------|-------|
|                         |                         | Wald                 | OR        | 95%CI       | P     |
| Maternal age            |                         | 1.129                | 0.991     | 0.975–1.008 | 0.288 |
| Paternal age            |                         | 0.335                | 0.996     | 0.982–1.010 | 0.563 |
| BMI                     |                         | 3.497                | 0.979     | 0.958–1.001 | 0.061 |
| Duration of infertility |                         | 0.432                | 1.010     | 0.981–1.039 | 0.511 |
| Type of infertility     |                         |                      |           |             |       |
|                         | Primary                 |                      | Reference |             |       |
|                         | Secondary               | 0.268                | 0.963     | 0.835–1.111 | 0.605 |
| Factor of infertility   |                         |                      |           |             |       |
|                         | Female factor           |                      |           |             |       |
|                         | Male factor             | 0.003                | 0.995     | 0.836–1.185 | 0.956 |
|                         | Mixed factor            | 0.566                | 0.927     | 0.762–1.129 | 0.452 |
|                         | Unexplained infertility | 0.028                | 1.026     | 0.757–1.390 | 0.868 |

|                             |      |        |       |             |              |
|-----------------------------|------|--------|-------|-------------|--------------|
| Type of blastocyst transfer |      |        |       |             |              |
|                             | ET   |        |       | Reference   |              |
|                             | FET  | 3.202  | 0.871 | 0.750–1.013 | 0.074        |
| Type of fertilization       |      |        |       |             |              |
|                             | ICSI |        |       | Reference   |              |
|                             | IVF  | 0.045  | 0.973 | 0.758–1.250 | 0.832        |
| Day of blastocyst transfer  |      |        |       |             |              |
|                             | D5   |        |       | Reference   |              |
|                             | D6   | 0.200  | 0.961 | 0.809–1.142 | 0.655        |
| ICM                         |      |        |       |             |              |
|                             | B    |        |       | Reference   |              |
|                             | A    | 7.308  | 0.806 | 0.689–0.942 | <b>0.007</b> |
| TE                          |      |        |       |             |              |
|                             | C    |        |       | Reference   |              |
|                             | B    | 14.255 | 1.366 | 1.162–1.607 | <b>0.001</b> |



|                                |      |        |           |             |              |
|--------------------------------|------|--------|-----------|-------------|--------------|
|                                | A    | 16.617 | 1.506     | 1.237–1.833 | <b>0.001</b> |
| Blastocyst quality of transfer |      |        |           |             |              |
|                                | Poor |        | Reference |             |              |
|                                | Good | 20.134 | 1.410     | 1.214–1.639 | <b>0.001</b> |

---

572 Note: The sex ratio at birth is calculated as the proportion of males among all live births.

573 CI = confidence interval; BMI = body mass index; D = day; IVF = in vitro fertilization; ICSI = intracytoplasmic sperm injection; ET = fresh  
574 embryo transfer; FET = frozen embryo transfer; ICM = Inner cell mass; TE = Trophectoderm

575

576 **Table 3.** Multivariate logistic regression model of sex ratio (male) among singleton births following single blastocyst transfer cycles in relation  
 577 to blastocyst quality and morphology.

| Blastocyst         | Mutivariable Logistic Regression analysis (not adjusted) |             |                  | Mutivariable Logistic Regression analysis (adjusted) |             |                  |
|--------------------|----------------------------------------------------------|-------------|------------------|------------------------------------------------------|-------------|------------------|
|                    | OR                                                       | 95% CI      | P                | aOR                                                  | 95% CI      | P                |
| ICM                |                                                          |             |                  |                                                      |             |                  |
| B                  | Reference                                                |             |                  | Reference                                            |             |                  |
| A                  | 0.638                                                    | 0.534–0.761 | <b>&lt;0.001</b> | 0.632                                                | 0.529–0.757 | <b>&lt;0.001</b> |
| TE                 |                                                          |             |                  |                                                      |             |                  |
| C                  | Reference                                                |             |                  |                                                      |             |                  |
| B                  | 1.492                                                    | 1.263–1.62  | <b>0.011</b>     | 1.510                                                | 1.269–1.796 | <b>&lt;0.001</b> |
| A                  | 1.937                                                    | 1.551–2.420 | <b>&lt;0.001</b> | 1.964                                                | 1.559–2.474 | <b>&lt;0.001</b> |
| Blastocyst quality |                                                          |             |                  |                                                      |             |                  |
| Poor               | Reference                                                |             |                  | Reference                                            |             |                  |
| Good               | 1.506                                                    | 1.237–1.833 | <b>&lt;0.001</b> | 1.552                                                | 1.259–1.915 | <b>&lt;0.001</b> |

578 Note: Sex ratio among singleton births following single blastocyst transfer cycles by different grades of trophoctoderm (TE) and inner cell mass  
579 (ICM).  $P < 0.05$  was considered statistically significant. CI= confidence interval;  
580

581 **Table 4.** Effect of stratified maternal and paternal age and quality classification of ICM grade, TE grade, transferred blastocysts on sex ratio.

|              | Stratified | Blastocyst | Quality classification | OR        | 95% CI      | P                |
|--------------|------------|------------|------------------------|-----------|-------------|------------------|
|              |            | ICM        |                        |           |             |                  |
| Maternal age | ≤35        |            | B                      | Reference |             |                  |
|              |            |            | A                      | 0.803     | 0.677–0.951 | <b>0.011</b>     |
|              | >35        |            | B                      | Reference |             |                  |
|              |            |            | A                      | 0.802     | 0.533–1.206 | 0.289            |
| Paternal age | ≤35        |            | B                      | Reference |             |                  |
|              |            |            | A                      | 0.791     | 0.663–0.942 | <b>0.009</b>     |
|              | >35        |            | B                      | Reference |             |                  |
|              |            |            | A                      | 0.862     | 0.609–1.219 | 0.401            |
|              |            | TE         |                        |           |             |                  |
| Maternal age | ≤35        |            | C                      | Reference |             |                  |
|              |            |            | B                      | 1.401     | 1.172–1.676 | <b>&lt;0.001</b> |
|              |            |            | A                      | 1.589     | 1.282–1.970 | <b>&lt;0.001</b> |

|                        |     |      |           |             |                  |
|------------------------|-----|------|-----------|-------------|------------------|
|                        | >35 | C    | Reference |             |                  |
|                        |     | B    | 1.208     | 0.820–1.778 | 0.339            |
|                        |     | A    | 1.082     | 0.653–1.794 | 0.759            |
| Paternal age           | ≤35 | C    | Reference |             |                  |
|                        |     | B    | 1.555     | 1.245–1.942 | <b>&lt;0.001</b> |
|                        |     | A    | 1.333     | 0.867–2.049 | 0.19             |
|                        | >35 | C    | Reference |             |                  |
|                        |     | B    | 1.389     | 1.154–1.671 | <b>0.001</b>     |
|                        |     | A    | 1.298     | 0.927–1.818 | 0.129            |
| Transferred blastocyst |     |      |           |             |                  |
| Maternal age           | ≤35 | Poor | Reference |             |                  |
|                        |     | Good | 1.461     | 1.238–1.725 | <b>&lt;0.001</b> |
|                        | >35 | Poor | Reference |             |                  |
|                        |     | Good | 1.17      | 0.818–1.672 | 0.39             |
| Paternal age           | ≤35 | Poor | Reference |             |                  |

|     |      |           |             |                  |
|-----|------|-----------|-------------|------------------|
|     | Good | 1.442     | 1.214–1.712 | <b>&lt;0.001</b> |
| >35 | Poor | Reference |             |                  |
|     | Good | 1.309     | 0.959–1.786 | 0.09             |

---

582 Note: CI = confidence interval; OR = odd ratios; ICM = Inner cell mass; TE = Trophectoderm

Restrospective Cohort study:Data Jan  
2017-Dec 2019  
Total SEB cycles:5362

Autologous non-PGT cycles:5285

Single live birth cycles for  
analysis:3108

## Exclusions

PGT cycles:177

Miscarriage cycles:328  
Ectopic pregnancy cycles:29  
Monozygotic twin cycles:56

Figure

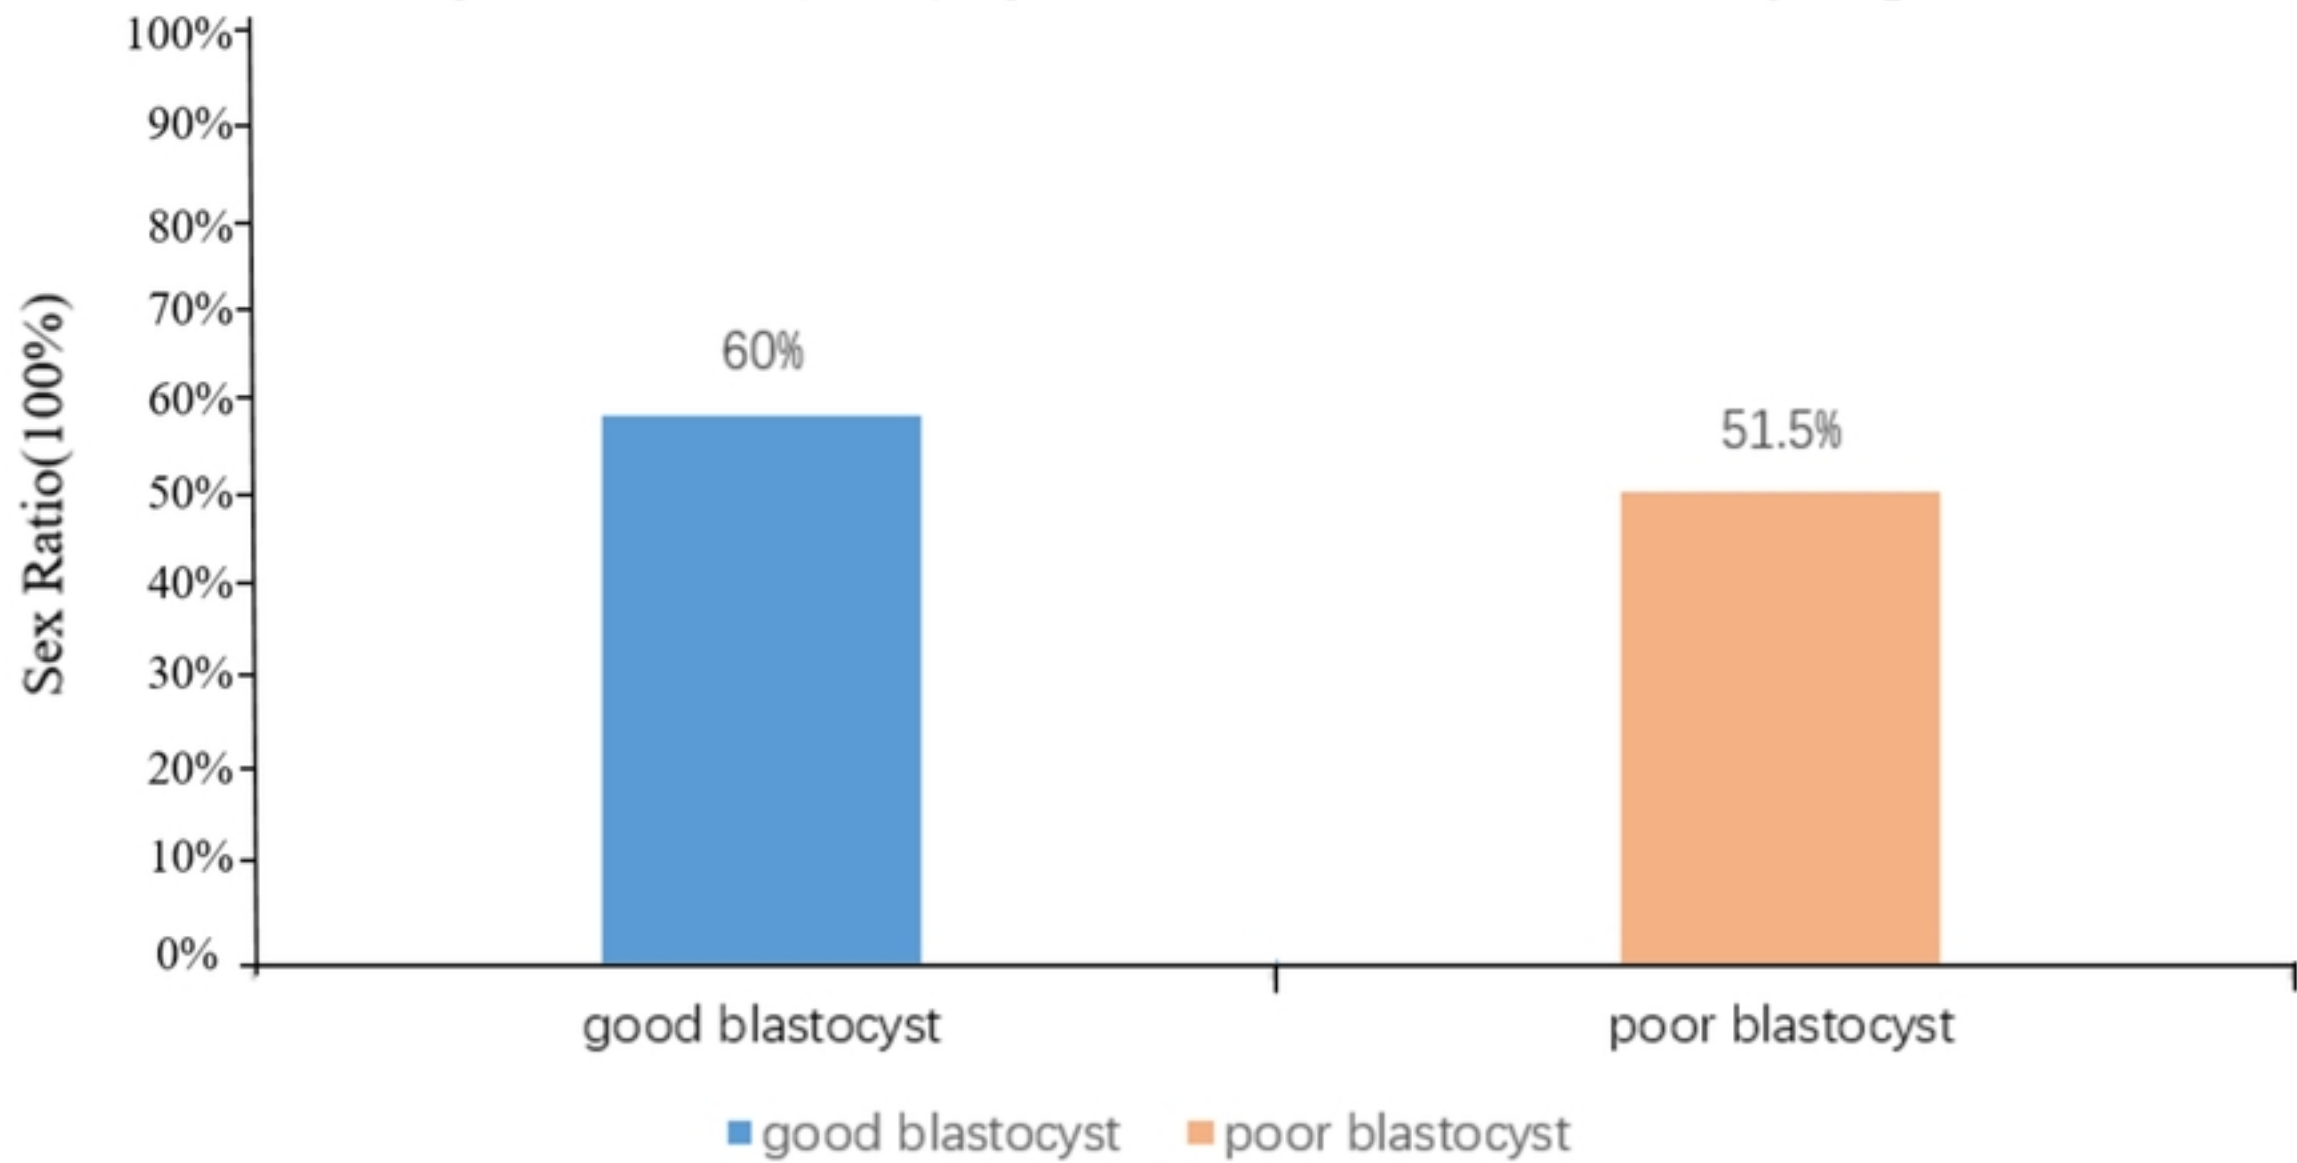

Figure
